# Supplementary material for: Depletion of CD4+ T cells abrogates post-peak decline of viremia in SIV-infected rhesus macaques
Source: JCI journal article supplement (doi:10.1172/jci46023), 2011-10-17

## Supplementary Figure Legends

*Figure S1 – CD4+ lymphocyte-depleting treatment was not associated with changes in the CD8+ T-cell, B-cell, or monocyte dynamics before and after SIV infection.*

Longitudinal assessment of the absolute count ( $\pm$  SEM) per  $\mu$ l of blood of CD8+ T-cells (A), CD20+ B-cells (B) and CD14+ monocytes (C) before and after SIV infection.

*Figure S2 - CD4+ lymphocyte-depleted SIV-infected RMs do not show increased infection of naive CD4+ T-cells or monocytes.*

Levels of cell-associated SIV-DNA were measured by RT-PCR on sorted cell subsets isolated at days 14 and 42 post-infection in CD4+ lymphocyte-depleted RMs and undepleted controls, as well as animal RUv6 that experienced a modest CD4+ T-cell depletion following treatment with Cdr-OKT4A-hulgG1. (A) Calculated percentage of SIV-infected monocytes and naive CD4+ T-cells. (B) Calculated percentage of SIV-infected central memory CD4+ T-cells ( $T_{CM}$ ) and effector memory CD4+ T-cells ( $T_{EM}$ ). Black line depicts median.

## Supplementary Figures and Tables

Supplementary Figure 1

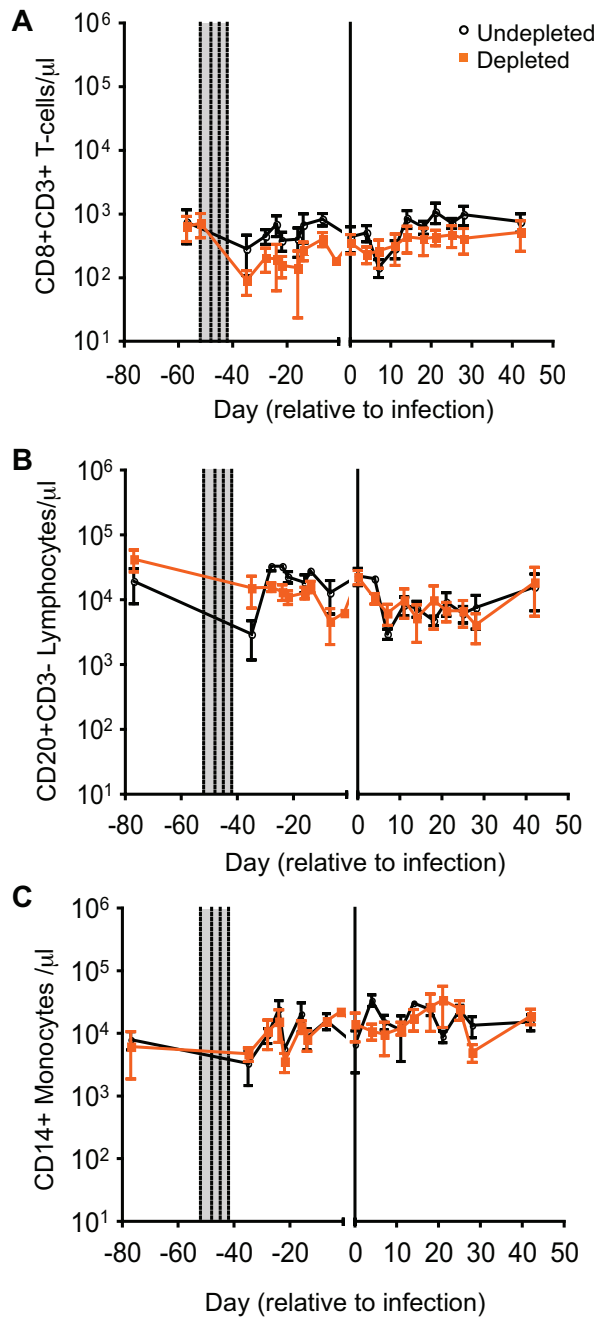

Supplementary Figure 2

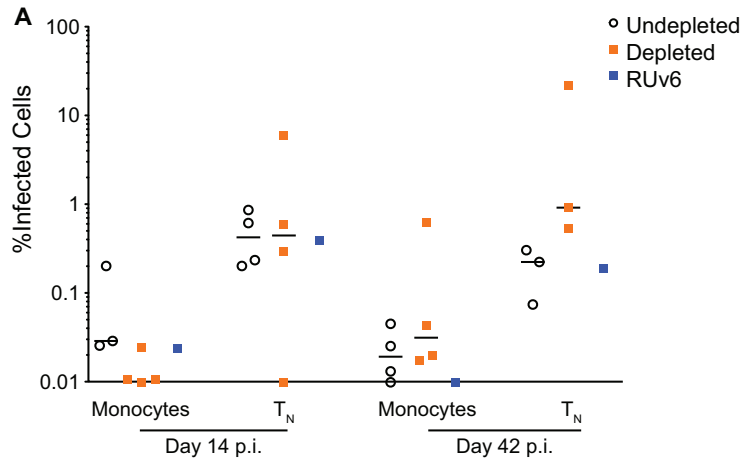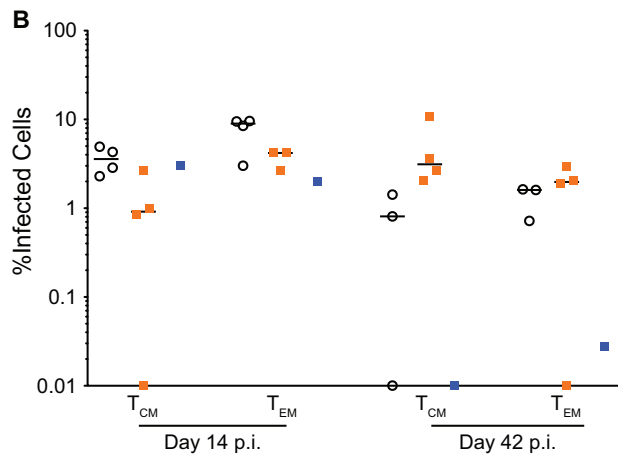

Supplement: sd1 [file 1]
